1  
2  
3  
4  
5  
6  
7  
8  
9  
10  
11  
12  
13  
14  
15  
16  
17  
18  
19  
20

## **Development and Evaluation of RT-LAMP Assays to Identify Variants of SARS-CoV-2**

Gun-Soo Park<sup>1, 2\*</sup>, Seong-Jun Kim<sup>1</sup>, Jin-Soo Maeng<sup>1, 2\*</sup>

<sup>1</sup> *Center for Convergent Research of Emerging Virus Infection, Korea Research Institute of Chemical Technology, Daejeon 34114, Republic of Korea*

<sup>2</sup> *Research Division of Food Convergence, Korea Food Research Institute, Wanju-gun, Jeollabuk-do 55365, Republic of Korea*

\* Corresponding authors

Gun-Soo Park (pcdhmk@kRICT.re.kr), and Jin-Soo Maeng (maengjs@kRICT.re.kr)

## 21 **Abstract**

22 Emergence of new variants of Severe Acute Respiratory Syndrome Coronavirus 2 (SARS-CoV-2)  
23 during current pandemic of Coronavirus Disease 2019 (COVID-19) and several waves of infections by  
24 some of variants emphasized the importance of continuous surveillance. While genomic surveillance  
25 through whole genome sequencing is performed as a standard method, identification of known  
26 variants through mutation-targeting molecular diagnosis such as qRT-PCR is also useful for timely  
27 investigation. However, there are limited studies regarding the concurrent detection and identification  
28 of SARS-CoV-2 variants through a LAMP-based method. In this study, we developed and evaluated  
29 RT-LAMP assays to detect characteristic deletions of SARS-CoV-2 variants. In addition, we evaluated  
30 a fluorescent probe mediated method for identification of single nucleotide substitution by RT-LAMP.  
31 Finally, we discussed restrictions and perspectives regarding pathogen screening and surveillance of  
32 variants by RT-LAMP based on our observations.

## 34 **Introduction**

35 During the COVID-19 pandemic, the evolution of SARS-CoV-2 give rise to many variants. Some of  
36 variants are designated as Variants of Concern (VOCs) or Variants of Interest (VOIs) due to known or  
37 potential threats to public health (<https://www.who.int/en/activities/tracking-SARS-CoV-2-variants/>, last  
38 accessed March 28, 2022). The risk factors behind the public health threats are higher  
39 transmissibility, atypical symptoms, diagnostic failure, decreased effects of therapeutics, and immune  
40 evasion to vaccine or previous infections.<sup>1</sup> VOCs and VOIs are named by Greek alphabet and five  
41 variants are designated as VOCS so far: Alpha (Pango lineage<sup>2</sup> B.1.1.7), Beta (B.1.351), Gamma  
42 (P.1), Delta (B.1.617.2) and Omicron (B.1.1.529). These VOCs induced several new waves of  
43 epidemics due to its higher transmissibility and/or immune evasion ability.<sup>3-5</sup> Especially, Omicron is  
44 divided into two major sublineages BA.1 and BA.2 ([https://github.com/cov-lineages/pango-](https://github.com/cov-lineages/pango-designation/issues/361)  
45 [designation/issues/361](https://github.com/cov-lineages/pango-designation/issues/361)), and BA.2 sublineage can outcompete BA.1 sublineage.<sup>6,7</sup>

46 As evidenced by recurrent emergence of SARS-CoV-2 variant and their phenotypic differences,  
47 constant surveillance is important for reaction. The standard method of variants surveillance is whole  
48 genome sequencing. Amplicon based partial sequencing can be used in limited way to identify known  
49 VOCs.<sup>8</sup> However, sequencing based identification of variants requires intense facilities and takes  
50 more turnaround time compare to qRT-PCR. Therefore, results of routine screening-incorporated  
51 qRT-PCR targeting VOC-characterizing mutations can be used as a proxy for some studies such as  
52 the timely prevalence of VOCs which are known to be circulating.<sup>9-11</sup> In fact, assays for various  
53 mutations of SARS-CoV-2 including single nucleotide substitutions are readily available.<sup>12</sup>

54 The gold-standard of COVID-19 diagnosis is qRT-PCR as the method is sensitive, specific and  
55 provide quantitative results. qRT-PCR is usually performed in centralized laboratories so that the  
56 method has some limitations regarding surveillance such as difficulty to expand test capacity.  
57 Therefore, point-of-care test (POCT) oriented methods like antigen-detecting rapid diagnostic tests  
58 (RDTs) or isothermal nucleic acid amplification tests (NAATs) are adopted for screening diagnosis.<sup>13</sup>  
59 Especially, many loop-mediated isothermal amplification (LAMP) or recombinase polymerase

60 amplification (RPA) based methods were developed as isothermal NAATs targeting SARS-CoV-2,  
61 some with CRISPR-Cas based detection.<sup>14-19</sup> Nevertheless, there are limited reports regarding  
62 identification of VOCs using isothermal NAATs.

63 In this study, we developed and evaluated reverse-transcription LAMP (RT-LAMP) methods to  
64 discriminate VOCs. We basically aimed to design LAMP reaction of which amplification is occurred  
65 variant-specifically because such methods are suitable for resource-limited POCT when combined  
66 with a simple readout such as colorimetric detection. In addition, we developed an one-step strand  
67 displacement probe (OSD-probe) RT-LAMP to discriminate single nucleotide substitution targeting the  
68 N501Y mutation of Spike.<sup>20</sup>

69

## 70 **Results**

### 71 *Target selection*

72 We firstly aimed to discriminate early three VOCs, Alpha, Beta, and Gamma, from non-VOC lineages  
73 as Delta was not emerged at the moment. By coincidence, large deletion (9 bp) corresponding to  
74 Orf1a SGF3675-3677del within nsp6 region was found in common for the three VOCs so that we  
75 chose the region as a target.<sup>21</sup> We also targeted Spike HV69-70del which is corresponding to S-gene  
76 target failure (STGF) of some qRT-PCR diagnostics and Spike N501Y substitution which is another  
77 common mutation among early three VOCs but all of the candidate primer sets showed poor  
78 sensitivity or failed to discriminate VOC sequences. For the Delta variant, Spike EF156-157del and  
79 R158G corresponding 6 bp deletion was selected as a target. For the Omicron-BA.1 variant, Spike  
80 GYY142-144del and Y145D corresponding 9 bp deletion and Spike ins214EPE corresponding  
81 insertion and we were able to obtain positive results for primer sets targeting the deletion region.  
82 Aligned surrounding sequences of target mutation are shown in Supplementary Figure 1. After  
83 screening, chosen primer sets were named after affected amino acids (Supplementary Table 1). All  
84 the primer sets targeting deletions showed best results with WarmStart Colorimetric LAMP 2X Master  
85 Mix.

86

### 87 *Sensitivity and cross-specificity of RT-LAMP targeting large deletions of VOCs*

88 Limit of detection (LoD) against viral RNAs and cross-reactivity to non-target lineages were  
89 evaluated. For SGF primer sets, both composition targeting intact or deleted (designated with “del”)  
90 sequences showed similar LoD of 50-100 copies/reaction with stochastic detection of 10  
91 copies/reaction samples (Fig. 1A). To test cross-reactivity of primer sets, we used up to  $2.5 \times 10^6$   
92 copies/reaction of templates considering  $\sim 10^9$  copies/ml of average viral load of SARS-CoV-2.<sup>22</sup> SGF  
93 primer sets showed no cross-reactivity within tested concentrations (Fig. 1B).

94 Omicron-BA.1 has slightly different deletion near the target of SGF primer sets which includes Orf1a  
95 L3674 but excludes F3677 so that G-A mismatch occurs at 3' -5 residue of SGF-FIPdel primer. As a  
96 result, LoD of SGFdel primer set to Omicron-BA.1 was 500-1000 copies/reaction (Fig. 1C). SGF  
97 primer set showed no cross-reactivity to Omicron-BA.1 within tested concentrations (Fig. 1D).

98 For EFR primer set, non-Delta specific primer set showed positive results during primary screening.  
99 With this primer set, therefore, discrimination of Delta variant could be done by target gene  
100 amplification failure. LoD of EFR primer set to non-Delta variants is 200 copies/reaction (Fig. 1E).  
101 EFR primer set showed cross-reactivity to high copy Delta template from  $2.5 \times 10^5$  copies/reaction  
102 (Fig. 1F).

103 GYdel primer set specifically amplify Omicron-BA.1 template with LoD of 50-100 copies/reaction  
104 (Fig. 1G). GY primer set which can amplify non-BA.1 template showed LoD of 200 copies/reaction  
105 with stochastic detection of 100 or 50 copies/reaction samples (Fig. 1H). Both GYdel and GY  
106 primer sets showed no cross-reactivity within tested concentrations. Notably, GYdel showed late  
107 threshold time (Tt) so that incubation time was extended to 90 minutes (Supplementary Fig. 2).

108

#### 109 *OSD-probe RT-LAMP targeting Spike N501Y mutation*

110 Although VOCs coincidentally have characteristic large deletions which are suitable for discriminating  
111 RT-LAMP target, such mutations occur less frequently than single nucleotide substitution.<sup>23</sup> In  
112 addition, single nucleotide substitution can be both characteristic and functionally important.<sup>24,25</sup>  
113 Therefore, we sought to develop a RT-LAMP based diagnostic method to discriminate single  
114 nucleotide substitution of SARS-CoV-2. We utilized OSD-probe because the method was reported to  
115 distinguish single nucleotide substitution.<sup>20</sup> OSD-probe functions independently of LAMP primers so  
116 that non-specific detection of primer-induced amplification can be avoided and LAMP primer design is  
117 less restricted compare to some other fluorescence based detection methods for LAMP.<sup>26</sup> As a target,  
118 Spike N501Y mutation was selected from its convergent emergence in early three VOCs.

119 OSD-probes did not work properly in WarmStart Colorimetric LAMP 2X Master Mix during primary  
120 screen unlike deletion-targeting RT-LAMP. Therefore, *Bst* 2.0 based reaction was adapted. After  
121 primer screen, OSD-probe RT-LAMP reaction was optimized for temperature, Betaine usage,  
122 concentrations of dNTP and Mg<sup>2+</sup> ion, and concentration of OSD-probe. While LAMP reaction itself  
123 showed LoD of 500-1000 copies/reaction, proper discrimination of mutation can be from 1000-2000  
124 copies/reaction of template (Fig.2A). The requirement of higher concentration of templates for  
125 mutation discrimination by OSD-probe is due to its mechanism. OSD-probe can discriminate single  
126 nucleotide substitution via different chance of toehold binding and subsequent exchange of strand  
127 annealed to fluorescent dye tagged oligonucleotide. Therefore, high concentration of LAMP product is  
128 required to observe differential signal by template-probe combinations. To obtain such amount of  
129 LAMP product, early beginning of amplification from high concentration of starting template is desired.  
130 As a supporting evidence, rather clear difference of end-point fluorescence signals are observed  
131 when high-copy templates are used (Fig.2B).

132 As Omicron variants emerged, we tested OSD-probe RT-LAMP for Spike N501Y with BA.1 viral  
133 RNA. As a result, template induced LAMP reaction was only observed for reactions with high RNA  
134 copies. OSD-probe signal was not properly generated, consistent with varying Tt of LAMP reaction  
135 (Supplementary Fig.3). The reason would be many mutations in F1/B1 primer region; three residues

136 in F1 region of Omicron, three or two residues in B1 region of BA.1 or BA.2, respectively, are mutated  
137 verses each primer sequences.

138

### 139 **Discussion**

140 As a new variant of pathogen emerges during an epidemic, the variant may be detected by genomic  
141 surveillance or epidemiologic surveillance followed by confirmation by whole genome sequencing.  
142 Then, the degree of threats to public health by new variants should be quickly assessed by their  
143 epidemiologic features such as reproduction number or by phenotypic assays regarding immune  
144 evasion and response to treatments.<sup>27</sup> Upon the results of aforementioned assays, the variant may be  
145 declared as a VOI or a VOC then public health policies may be changed including active monitoring of  
146 the variant. The monitoring includes identification of the variant either by sequencing or by molecular  
147 diagnosis targeting characteristic mutations. Because emergence and spread of such variants can be  
148 rapid as witnessed from cases of SARS-CoV-2<sup>5</sup>, concurrent detection of pathogen and identification of a  
149 certain variant by molecular diagnostic methods is favorable than sequencing due to different  
150 turnaround time. Additionally, a method for the active monitoring should be both sensitive to fulfill  
151 diagnostic purpose and rapidly adaptable to new mutations for a case that the target variant is  
152 characterized by a novel mutation. While qRT-PCR meets the criteria, partially due to controlled  
153 primer-probe annealing through thermal cycling, adaptability of isothermal NAATs requires further  
154 evaluations. For this purpose, we developed and evaluated RT-LAMP methods to identify SARS-CoV-  
155 2 VOCs. Especially, we designed RT-LAMP to amplify templates from specific target variants to keep  
156 resource-limited POCT oriented virtues of LAMP.

157 To summarize, we were able to develop RT-LAMP methods to discriminate VOCs by targeting large  
158 deletions. By targeting Orf1a SGF3675-3677del of Alpha, Beta, Gamma and Omicron-BA.2, LoD of  
159 50-100 copies/reaction was observed with no cross-reactivity up to  $2.5 \times 10^6$  copies/reaction. For  
160 Omicron-BA.1, ten-fold increased LoD was observed due to different deletion position result in single  
161 nucleotide mismatch in a LAMP primer. By targeting Delta-specific Spike EF156-157del and R158G  
162 corresponding deletion, LoD of 200 copies/reaction was observed for non-Delta variant with no cross  
163 reactivity up to  $2.5 \times 10^4$  copies/reaction of Delta template. For Omicron-BA.1 specific Spike GYV142-  
164 144del and Y145D corresponding deletion, LoD of 50-200 copies/reaction was observed with no  
165 cross reactivity up to  $2.5 \times 10^6$  copies/reaction. Additionally, we introduced an OSD-probe RT-LAMP  
166 method to discriminate Spike N501Y mutation.

167 We partially succeeded in development of concurrent RT-LAMP methods for COVID-19 screening  
168 and VOCs identification. First, RT-LAMP for simple binary readouts such as colorimetric detection  
169 was possible for codon-scale mutations. As we screened LAMP primers for both criteria of sensitivity  
170 and VOC specificity, our failure of designing RT-LAMP primer for Spike N501Y mutation does not  
171 negate potential of LAMP based detection of single nucleotide mutations. In fact, allele-specific LAMP  
172 methods were possible for various targets.<sup>28,29</sup> Nevertheless, mutation detection by LAMP primers  
173 only may not be applied in general cases. For example, EFR primer set showed cross-reactivity from  
174  $2.5 \times 10^5$  copies/reaction of Delta template. This cross-reactivity would be from sequence similarity at

175 direct downstream of the deletion region (AGTTcA – gAGTTtA, Supplementary Fig.1C). Due to  
176 relatively poor sensitivity of LAMP based methods compare to PCR based methods, efforts to  
177 increase LAMP sensitivity were made.<sup>30-33</sup> Considering the mechanism of LAMP amplification which  
178 rely on thermodynamic chance of primer invasion and loop formation, such efforts seem to result in  
179 increased robustness and decreased specificity contrarily. On the other hand, adapting touchdown  
180 procedure for semi-controlled primer binding in LAMP increased both sensitivity and specificity.<sup>34</sup>

181 To accomplish both of sensitive screening and specific identification through LAMP, detection of  
182 mutations can be performed by sequence specific methods independent of LAMP reaction.<sup>29</sup> In this  
183 case, LAMP primer can be optimized as long as the target mutation reside within a amplicon. Simple  
184 oligonucleotide probes such as OSD-probe or molecular beacon are reported to be able to  
185 discriminate single nucleotide variation with LAMP.<sup>20,35</sup> Both methods are successfully applied for  
186 multiplexed or variant detection of SARS-CoV-2 with LAMP.<sup>36,37</sup> Nevertheless, OSD-probe and  
187 molecular beacon require fluorescence detection as a readout and targeting loop region of LAMP  
188 product so that the design of LAMP primers is still somewhat restricted. CRISPR-Cas based detection  
189 methods are of particular interest because the system can detect single nucleotide variations, is  
190 multiplexable and have versatile readout methods.<sup>38,39</sup> Additionally, detection target can be any region  
191 within the amplicon for widely used Cas12 or Cas13 methods; Cas12 can target both single-stranded  
192 or double-stranded DNA and RNA generation step is incorporated for Cas13.<sup>40,41</sup> Indeed, studies  
193 detecting SARS-CoV-2 mutations through CRISPR-Cas systems were reported.<sup>42-44</sup>

194 Another obstacle for SARS-CoV-2 variants identification is multiplexing. Since many mutations are  
195 convergently emerged in subsets of variants, combinations of mutations should be determined for  
196 identification of a certain variant. From the POCT point of view, using multiple fluorescent dyes is not  
197 favorable because accompanying instrument would become expensive. One option is lateral flow  
198 assay (LFA). Simple readout provided by LFA is beneficial for POCT especially when it is performed  
199 by minimally trained personnel and multiplexed test is possible by using differently labelled primers.  
200 Therefore, LFA have been utilized as a LAMP readout.<sup>45-47</sup> While coupling of LAMP and LFA requires  
201 well-designed mutation specific LAMP reactions for variant identification, such LAMP can be hard to  
202 develop as we discussed. At this point, detection of mutations by CRISPR-Cas system would be  
203 applicable because; (1) LFA, LAMP and CRISPR-Cas detection can be merged<sup>17</sup>, and (2) CRISPR-  
204 Cas based multiplexing and single nucleotide variation is possible.<sup>38,44</sup> Another option is to run  
205 multiple reactions by targets using multi-compartment design.<sup>48-51</sup> Multi-compartment design may  
206 require more amount of sample and reagent compare to single-tube multiplexing which would be  
207 coupled with LFA. However, cross-contamination would be minimized as no extra step is required  
208 after amplification.

209 From the diagnostic point of view, the priority is to avoid detection failure since the identification of  
210 variants is not a primary goal of diagnosis.<sup>52</sup> With such priority, LAMP has intrinsic weakness for  
211 concurrent pathogen detection and variant identification regardless of selection of detection methods.  
212 LAMP reaction requires up to eight primer binding sites, including loop primers, aligned to form  
213 characteristic dumbbell structure within around 200 bp target region. Each primer binding sites should



214 have desirable sequences with criteria like proper GC percentage, no long repeat of single base and  
215 minimum primer-primer interaction. Naturally, limited regions on a genome would be proper target of  
216 LAMP and indeed selected, partially due to limited tools for primer design.<sup>15</sup> Unless target mutations  
217 for variant identification overlap a proper LAMP amplicon region, LoD of the mutation targeting LAMP  
218 would be higher compare to detection-oriented LAMP. Indeed, LoD of some primer sets used in this  
219 study – EFR, GYV and S501 – were higher than previously reported SARS-CoV-2 detecting LAMP  
220 primers.<sup>14,17,53</sup>

221 Constant monitoring and alarming of new variants is especially important for hypothetical origin of  
222 VOCs/VOIs such as a chronic patient, wild animals, or patients in a place lacking sufficient genomic  
223 surveillance capacity.<sup>27</sup> Diagnosis-coupled detection of new mutation would be effective as target  
224 subjects requires routine tests or tests should be done in place-of-care. For such monitoring, the large  
225 coverage of target amplicon by LAMP primers would be beneficial. When a mutation occurs within  
226 LAMP primer binding sites, sensitivity and threshold time would be affected. The most effective  
227 targets would be mutation hot-spots such as receptor binding motif of SARS-CoV-2. Indeed, the  
228 sensitivity of S501 primer set was affected by mutations introduced in Omicron (Supplementary  
229 Fig.3). Otherwise, sequencing can be adapted taking advantage of relatively longer amplicon size of  
230 LAMP than qPCR. For instance, a place-of-care oriented method utilizing nanopore sequencing was  
231 reported.<sup>54</sup> Finally, pathogen detection-oriented LAMP should be included in the test to avoid missing  
232 infections and as a test-positivity comparing control. The target should be both conserved and  
233 abundant. In case of SARS-CoV-2, a conserved region in *N*-gene would serve the purpose as the  
234 target template copy number is highest among Orfs by the composition of sub-genomic RNAs.<sup>55-57</sup>

235 In conclusion, we developed and evaluated RT-LAMP methods to detect and discriminate SARS-  
236 CoV-2 VOCs. Based on our observations, restrictions and potentials of LAMP based methods are  
237 discussed in the perspective of reacting to pathogen's variants.

238

## 239 **Methods**

### 240 *Viral RNA*

241 SARS-CoV-2 viral RNA of wild-type lineage (BetaCoV/Korea/KCDC03/2020, provided by Korea  
242 Disease Control and Prevention Agency) and Delta variant (NCCP 43390, provided by Korea National  
243 Culture Collection for Pathogens) were prepared as previously described.<sup>58</sup> Viral RNA from GH clade  
244 (NCCP 43345), Alpha variant (NCCP 43381), Beta variant (NCCP 43382), and Omicron-BA.1 variant  
245 (NCCP 43408) were provided by Korea National Culture Collection for Pathogens.

246 The copy number of viral RNAs were titrated by qRT-PCR using Luna Universal Probe One-Step  
247 RT-qPCR Kit (NEB) and LightCycler 96 instrument (Roche). Primers and probes are listed in  
248 Supplementary Table 2. *In vitro* transcribed standard RNAs were prepared from cloned fragments  
249 containing each amplicon of qRT-PCR. Briefly, RNAs were synthesized with MEGAscript T7  
250 Transcription Kit (Thermo Scientific) and purified with ZymoClean Gel RNA Recovery Kit (Zymo  
251 Research) after electrophoresis using native 1x MOPS buffered agarose gel.

252

## 253 *RT-LAMP*

254 LAMP primers were designed based on suggestions given by PrimerExplorer V5  
255 (<http://primerexplorer.jp/lampv5e/index.html>, last accessed March 28, 2022) for each target. The  
256 working concentration of LAMP primers are as follow: 1.6  $\mu$ M for inner primers (FIP/BIP), 0.2  $\mu$ M for  
257 outer primers (F3/B3), and 0.4  $\mu$ M for loop primers (LF/LB). All RT-LAMP reactions were performed  
258 with 2  $\mu$ l of templates in TE buffer (10 mM Tris-Cl, pH 7.5, and 1 mM EDTA) for total 15  $\mu$ l reaction  
259 volume. For deletion-targeting RT-LAMP, WarmStart Colorimetric LAMP 2X Master Mix (NEB) was  
260 used with 0.4  $\mu$ M SYTO-9 (Thermo Scientific).

261 For OSD-probe RT-LAMP, OSD-probes were designed and prepared following instructions in  
262 previous reports.<sup>20,36</sup> Working concentration of OSD-probe was 50 nM by fluorescent probe and probe  
263 to quencher ratio was 1:5. Other components of OSD-probe RT-LAMP than template, primers and  
264 probe are as follow: 1x Isothermal Amplification Buffer I [NEB; 20 mM Tris-HCl, pH 8.8, 10 mM  
265 (NH<sub>4</sub>)<sub>2</sub>SO<sub>4</sub>, 50 mM KCl, 2 mM MgSO<sub>4</sub>, and 0.1% Tween 20], 4 mM MgSO<sub>4</sub> (NEB; final, 6 mM Mg<sup>2+</sup>),  
266 1 mM each dNTP (Enzymomics), 0.4  $\mu$ M SYTO-82 (Thermo Scientific), 6 U *Bst* 2.0 WarmStart DNA  
267 polymerase (NEB), and 2.25 U WarmStart® RTx Reverse Transcriptase (NEB). Leuco crystal violet  
268 solution was added for end-point colorimetric detection as previously described.<sup>14</sup>

269 RT-LAMP reactions were performed using LightCycler 96 instrument and fluorescence signals were  
270 measured for every minute. For deletion-targeting RT-LAMP, reactions were performed for 40  
271 minutes at 65°C. For OSD-probe LAMP, reactions were performed for 90 minutes at 60°C. Any  
272 changed conditions are specified.

273

## 274 **Supplementary Information**

275 Supplementary tables, figures and their legends are provided as supplementary information.

276

## 277 **Acknowledgements**

278 Authors thank to Korea Centers for Disease Control and Prevention (KCDC) for kind and rapid sharing  
279 of isolated strain of SARS-CoV-2. This work was supported by the National Research Council of  
280 Science and Technology (NST) grant by the Ministry of Science and ICT (Grant No. CRC-16-01-KRICT  
281 and GN160600-KFRI).

282

## 283 **Author Contributions**

284 G.-S.P. designed and performed experiments. S.-J.K. provided samples. G.-S.P. and J.-S.M. wrote  
285 the manuscript.

## 286 **Competing Interests**

287 The authors declare no competing interests.

## 288 **Data Availability**

289 No datasets were generated or analyzed during the current study.

290



291 **References**

- 292 1 World Health Organization. Guidance for surveillance of SARS-CoV-2 variants: Interim  
293 guidance, 9 August 2021. (2021).
- 294 2 Rambaut, A. *et al.* A dynamic nomenclature proposal for SARS-CoV-2 lineages to assist  
295 genomic epidemiology. *Nat Microbiol* **5**, 1403-1407, doi:10.1038/s41564-020-0770-5 (2020).
- 296 3 Tao, K. *et al.* The biological and clinical significance of emerging SARS-CoV-2 variants. *Nat*  
297 *Rev Genet* **22**, 757-773, doi:10.1038/s41576-021-00408-x (2021).
- 298 4 Viana, R. *et al.* Rapid epidemic expansion of the SARS-CoV-2 Omicron variant in southern  
299 Africa. *Nature* **603**, 679-686, doi:10.1038/s41586-022-04411-y (2022).
- 300 5 World Health Organization. Enhancing readiness for omicron (B. 1.1. 529): technical brief and  
301 priority actions for member states. (2022).
- 302 6 Lyngse, F. P. *et al.* Transmission of SARS-CoV-2 Omicron VOC subvariants BA.1 and BA.2:  
303 Evidence from Danish Households. *medRxiv*, 2022.2001.2028.22270044,  
304 doi:10.1101/2022.01.28.22270044 (2022).
- 305 7 Iketani, S. *et al.* Antibody evasion properties of SARS-CoV-2 Omicron sublineages. *Nature*,  
306 doi:10.1038/s41586-022-04594-4 (2022).
- 307 8 European Centre for Disease Prevention and Control & World Health Organization Regional  
308 Office for Europe. Methods for the detection and characterisation of SARS-CoV-2 variants –  
309 first update. (2021).
- 310 9 Davies, N. G. *et al.* Estimated transmissibility and impact of SARS-CoV-2 lineage B.1.1.7 in  
311 England. *Science* **372**, doi:10.1126/science.abg3055 (2021).
- 312 10 Wolter, N. *et al.* Early assessment of the clinical severity of the SARS-CoV-2 omicron variant  
313 in South Africa: a data linkage study. *Lancet* **399**, 437-446, doi:10.1016/S0140-  
314 6736(22)00017-4 (2022).
- 315 11 Lentini, A., Pereira, A., Winqvist, O. & Reinius, B. Monitoring of the SARS-CoV-2 Omicron  
316 BA.1/BA.2 variant transition in the Swedish population reveals higher viral quantity in BA.2  
317 cases. *medRxiv*, 2022.2003.2026.22272984, doi:10.1101/2022.03.26.22272984 (2022).
- 318 12 Lai, E. *et al.* A method for variant agnostic detection of SARS-CoV-2, rapid monitoring of  
319 circulating variants, detection of mutations of biological significance, and early detection of  
320 emergent variants such as Omicron. *medRxiv*, 2022.2001.2008.22268865,  
321 doi:10.1101/2022.01.08.22268865 (2022).
- 322 13 World Health Organization. Public health surveillance for COVID-19: Interim guidance, 14  
323 February 2022. (2022).
- 324 14 Park, G. S. *et al.* Development of Reverse Transcription Loop-Mediated Isothermal  
325 Amplification Assays Targeting Severe Acute Respiratory Syndrome Coronavirus 2 (SARS-  
326 CoV-2). *J Mol Diagn* **22**, 729-735, doi:10.1016/j.jmoldx.2020.03.006 (2020).
- 327 15 Alves, P. A. *et al.* Optimization and Clinical Validation of Colorimetric Reverse Transcription  
328 Loop-Mediated Isothermal Amplification, a Fast, Highly Sensitive and Specific COVID-19

- 329 Molecular Diagnostic Tool That Is Robust to Detect SARS-CoV-2 Variants of Concern. *Front*  
330 *Microbiol* **12**, 713713, doi:10.3389/fmicb.2021.713713 (2021).
- 331 16 Dong, Y. *et al.* Comparative evaluation of 19 reverse transcription loop-mediated isothermal  
332 amplification assays for detection of SARS-CoV-2. *Sci Rep* **11**, 2936, doi:10.1038/s41598-  
333 020-80314-0 (2021).
- 334 17 Broughton, J. P. *et al.* CRISPR-Cas12-based detection of SARS-CoV-2. *Nat Biotechnol* **38**,  
335 870-874, doi:10.1038/s41587-020-0513-4 (2020).
- 336 18 Ding, X. *et al.* Ultrasensitive and visual detection of SARS-CoV-2 using all-in-one dual  
337 CRISPR-Cas12a assay. *Nat Commun* **11**, 4711, doi:10.1038/s41467-020-18575-6 (2020).
- 338 19 Patchesung, M. *et al.* Clinical validation of a Cas13-based assay for the detection of SARS-  
339 CoV-2 RNA. *Nat Biomed Eng*, doi:10.1038/s41551-020-00603-x (2020).
- 340 20 Jiang, Y. S. *et al.* Robust strand exchange reactions for the sequence-specific, real-time  
341 detection of nucleic acid amplicons. *Anal Chem* **87**, 3314-3320, doi:10.1021/ac504387c  
342 (2015).
- 343 21 Martin, D. P. *et al.* The emergence and ongoing convergent evolution of the SARS-CoV-2  
344 N501Y lineages. *Cell* **184**, 5189-5200 e5187, doi:10.1016/j.cell.2021.09.003 (2021).
- 345 22 Puhach, O. *et al.* Infectious viral load in unvaccinated and vaccinated patients infected with  
346 SARS-CoV-2 WT, Delta and Omicron. *medRxiv*, 2022.2001.2010.22269010,  
347 doi:10.1101/2022.01.10.22269010 (2022).
- 348 23 Sanjuan, R., Nebot, M. R., Chirico, N., Mansky, L. M. & Belshaw, R. Viral mutation rates. *J*  
349 *Virol* **84**, 9733-9748, doi:10.1128/JVI.00694-10 (2010).
- 350 24 Korber, B. *et al.* Tracking Changes in SARS-CoV-2 Spike: Evidence that D614G Increases  
351 Infectivity of the COVID-19 Virus. *Cell* **182**, 812-827 e819, doi:10.1016/j.cell.2020.06.043  
352 (2020).
- 353 25 Wang, P. *et al.* Antibody resistance of SARS-CoV-2 variants B.1.351 and B.1.1.7. *Nature* **593**,  
354 130-135, doi:10.1038/s41586-021-03398-2 (2021).
- 355 26 Becherer, L. *et al.* Loop-mediated isothermal amplification (LAMP) – review and classification  
356 of methods for sequence-specific detection. *Analytical Methods* **12**, 717-746,  
357 doi:10.1039/C9AY02246E (2020).
- 358 27 Oude Munnink, B. B. *et al.* The next phase of SARS-CoV-2 surveillance: real-time molecular  
359 epidemiology. *Nat Med* **27**, 1518-1524, doi:10.1038/s41591-021-01472-w (2021).
- 360 28 Gill, P. & Hadian Amree, A. AS-LAMP: A New and Alternative Method for Genotyping.  
361 *Avicenna J Med Biotechnol* **12**, 2-8 (2020).
- 362 29 Varona, M. & Anderson, J. L. Advances in Mutation Detection Using Loop-Mediated  
363 Isothermal Amplification. *ACS Omega* **6**, 3463-3469, doi:10.1021/acsomega.0c06093 (2021).
- 364 30 Kimura, Y. *et al.* Optimization of turn-back primers in isothermal amplification. *Nucleic Acids*  
365 *Res* **39**, e59, doi:10.1093/nar/gkr041 (2011).
- 366 31 Khorosheva, E. M., Karymov, M. A., Selck, D. A. & Ismagilov, R. F. Lack of correlation  
367 between reaction speed and analytical sensitivity in isothermal amplification reveals the value

- 368 of digital methods for optimization: validation using digital real-time RT-LAMP. *Nucleic Acids*  
369 *Res* **44**, e10, doi:10.1093/nar/gkv877 (2016).
- 370 32 Zhou, Y. *et al.* A Mismatch-Tolerant Reverse Transcription Loop-Mediated Isothermal  
371 Amplification Method and Its Application on Simultaneous Detection of All Four Serotype of  
372 Dengue Viruses. *Front Microbiol* **10**, 1056, doi:10.3389/fmicb.2019.01056 (2019).
- 373 33 Zhang, Y. *et al.* Enhancing colorimetric loop-mediated isothermal amplification speed and  
374 sensitivity with guanidine chloride. *Biotechniques* **69**, 178-185, doi:10.2144/btn-2020-0078  
375 (2020).
- 376 34 Wang, D. G., Brewster, J. D., Paul, M. & Tomasula, P. M. Two methods for increased  
377 specificity and sensitivity in loop-mediated isothermal amplification. *Molecules* **20**, 6048-6059,  
378 doi:10.3390/molecules20046048 (2015).
- 379 35 Varona, M. & Anderson, J. L. Visual Detection of Single-Nucleotide Polymorphisms Using  
380 Molecular Beacon Loop-Mediated Isothermal Amplification with Centrifuge-Free DNA  
381 Extraction. *Anal Chem* **91**, 6991-6995, doi:10.1021/acs.analchem.9b01762 (2019).
- 382 36 Bhadra, S., Riedel, T. E., Lakhotia, S., Tran, N. D. & Ellington, A. D. High-Surety Isothermal  
383 Amplification and Detection of SARS-CoV-2. *mSphere* **6**, doi:10.1128/mSphere.00911-20  
384 (2021).
- 385 37 Sherrill-Mix, S., Van Duyne, G. D. & Bushman, F. D. Molecular Beacons Allow Specific RT-  
386 LAMP Detection of B.1.1.7 Variant SARS-CoV-2. *J Biomol Tech* **32**, 98-101,  
387 doi:10.7171/jbt.21-3203-004 (2021).
- 388 38 Kaminski, M. M., Abudayyeh, O. O., Gootenberg, J. S., Zhang, F. & Collins, J. J. CRISPR-  
389 based diagnostics. *Nat Biomed Eng* **5**, 643-656, doi:10.1038/s41551-021-00760-7 (2021).
- 390 39 Tang, Y. *et al.* The CRISPR-Cas toolbox for analytical and diagnostic assay development.  
391 *Chem Soc Rev* **50**, 11844-11869, doi:10.1039/d1cs00098e (2021).
- 392 40 Chen, J. S. *et al.* CRISPR-Cas12a target binding unleashes indiscriminate single-stranded  
393 DNase activity. *Science* **360**, 436-439, doi:10.1126/science.aar6245 (2018).
- 394 41 Schermer, B. *et al.* Rapid SARS-CoV-2 testing in primary material based on a novel multiplex  
395 RT-LAMP assay. *PLoS One* **15**, e0238612, doi:10.1371/journal.pone.0238612 (2020).
- 396 42 Patchesung, M. *et al.* A multiplexed Cas13-based assay with point-of-care attributes for  
397 simultaneous COVID-19 diagnosis and variant surveillance. *medRxiv*,  
398 2022.2003.2017.22272589, doi:10.1101/2022.03.17.22272589 (2022).
- 399 43 Nguyen, L. T. *et al.* A Thermostable Cas12b from *Brevibacillus*  
400 Leverages One-pot Detection of SARS-CoV-2 Variants of Concern. *medRxiv*,  
401 2021.2010.2015.21265066, doi:10.1101/2021.10.15.21265066 (2021).
- 402 44 de Puig, H. *et al.* Minimally instrumented SHERLOCK (miSHERLOCK) for CRISPR-based  
403 point-of-care diagnosis of SARS-CoV-2 and emerging variants. *Sci Adv* **7**,  
404 doi:10.1126/sciadv.abh2944 (2021).
- 405 45 Nurul Najian, A. B., Engku Nur Syafirah, E. A., Ismail, N., Mohamed, M. & Yean, C. Y.  
406 Development of multiplex loop mediated isothermal amplification (m-LAMP) label-based gold

- 407 nanoparticles lateral flow dipstick biosensor for detection of pathogenic *Leptospira*. *Anal Chim*  
408 *Acta* **903**, 142-148, doi:10.1016/j.aca.2015.11.015 (2016).
- 409 46 Zhang, Y., Yu, Y. & Ying, J. Y. Multi-Color Au/Ag Nanoparticles for Multiplexed Lateral Flow  
410 Assay Based on Spatial Separation and Color Co-Localization. *Advanced Functional*  
411 *Materials* **32**, 2109553, doi:<https://doi.org/10.1002/adfm.202109553> (2022).
- 412 47 Zhu, X. *et al.* Multiplex reverse transcription loop-mediated isothermal amplification combined  
413 with nanoparticle-based lateral flow biosensor for the diagnosis of COVID-19. *Biosens*  
414 *Bioelectron* **166**, 112437, doi:10.1016/j.bios.2020.112437 (2020).
- 415 48 Poritz, M. A. *et al.* FilmArray, an automated nested multiplex PCR system for multi-pathogen  
416 detection: development and application to respiratory tract infection. *PLoS One* **6**, e26047,  
417 doi:10.1371/journal.pone.0026047 (2011).
- 418 49 Song, J. *et al.* Two-Stage Isothermal Enzymatic Amplification for Concurrent Multiplex  
419 Molecular Detection. *Clin Chem* **63**, 714-722, doi:10.1373/clinchem.2016.263665 (2017).
- 420 50 Zhu, Y. S. *et al.* Multiplex and visual detection of African Swine Fever Virus (ASFV) based on  
421 Hive-Chip and direct loop-mediated isothermal amplification. *Anal Chim Acta* **1140**, 30-40,  
422 doi:10.1016/j.aca.2020.10.011 (2020).
- 423 51 Nguyen, H. V. *et al.* Nucleic acid diagnostics on the total integrated lab-on-a-disc for point-of-  
424 care testing. *Biosens Bioelectron* **141**, 111466, doi:10.1016/j.bios.2019.111466 (2019).
- 425 52 Thomas, E., Delabat, S., Carattini, Y. L. & Andrews, D. M. SARS-CoV-2 and Variant  
426 Diagnostic Testing Approaches in the United States. *Viruses* **13**, doi:10.3390/v13122492  
427 (2021).
- 428 53 Rabe, B. A. & Cepko, C. SARS-CoV-2 detection using isothermal amplification and a rapid,  
429 inexpensive protocol for sample inactivation and purification. *Proc Natl Acad Sci U S A* **117**,  
430 24450-24458, doi:10.1073/pnas.2011221117 (2020).
- 431 54 James, P. *et al.* LamPORE: rapid, accurate and highly scalable molecular screening for  
432 SARS-CoV-2 infection, based on nanopore sequencing. *medRxiv*,  
433 2020.2008.2007.20161737, doi:10.1101/2020.08.07.20161737 (2020).
- 434 55 Kim, D. *et al.* The Architecture of SARS-CoV-2 Transcriptome. *Cell* **181**, 914-921 e910,  
435 doi:10.1016/j.cell.2020.04.011 (2020).
- 436 56 Doddapaneni, H. *et al.* Oligonucleotide capture sequencing of the SARS-CoV-2 genome and  
437 subgenomic fragments from COVID-19 individuals. *PLoS One* **16**, e0244468,  
438 doi:10.1371/journal.pone.0244468 (2021).
- 439 57 Ogando, N. S. *et al.* SARS-coronavirus-2 replication in Vero E6 cells: replication kinetics,  
440 rapid adaptation and cytopathology. *J Gen Virol* **101**, 925-940, doi:10.1099/jgv.0.001453  
441 (2020).
- 442 58 Jung, Y. *et al.* Comparative Analysis of Primer-Probe Sets for RT-qPCR of COVID-19  
443 Causative Virus (SARS-CoV-2). *ACS Infect Dis* **6**, 2513-2523,  
444 doi:10.1021/acinfecdis.0c00464 (2020).
- 445

446 **Figure Legends**

447

448 **Figure 1.** End-point colorimetric results of RT-LAMP targeting deletions. Lineage of viral RNAs,  
449 primer sets, and template copy number per reaction are as designated. (A) Triplicate sensitivity test  
450 for SGF/SGFdel primer sets. (B) Duplicate cross-reactivity test for SGF/SGFdel primer sets.  
451 “Matched” primer-template pairs are of (A) and exchanged for “Mis-matched” samples. (C) Triplicate  
452 sensitivity test for SGFdel primer set to Omicron-BA.1 lineage. (D) Duplicate cross-reactivity test for  
453 SGF primer set to Omicron-BA.1. 1000 copies/reaction of GH clade viral RNA was used as positive  
454 control. (E) Triplicate sensitivity test for EFR primer set. (F) Duplicate cross-reactivity test for EFR  
455 primer set. 5000 copies/reaction of wild-type viral RNA (KCDC03) was used as positive control. (G-H)  
456 Sensitivity and cross-reactivity test of (G) GVYdel and (H) GVY primer sets. NTC, no template control.  
457

458 **Figure 2.** OSD-probe RT-LAMP results. Lineage of viral RNAs, template copy number per reaction,  
459 and OSD probe targets are as designated. (A) Base-line corrected end-point fluorescent signal  
460 intensities are shown as heat-map for a low-range copy number test. The heatmap was generated by  
461 Microsoft Excel program. (B) Real-time FAM fluorescence signal of OSD probes for a high-range copy  
462 number test. NTC, no template control.  
463

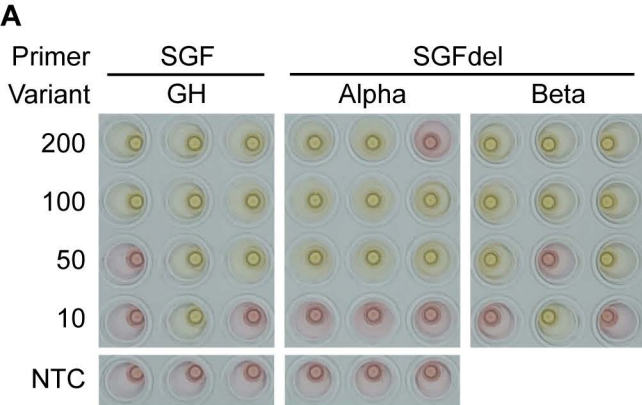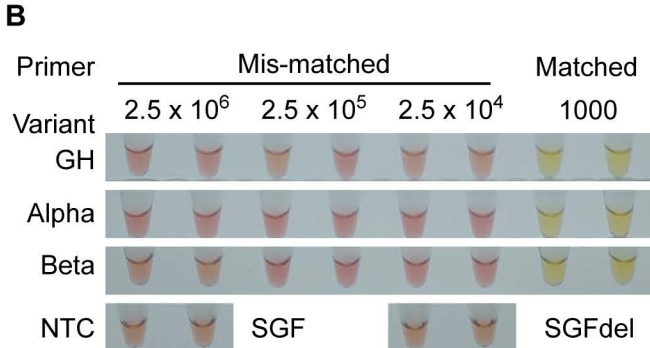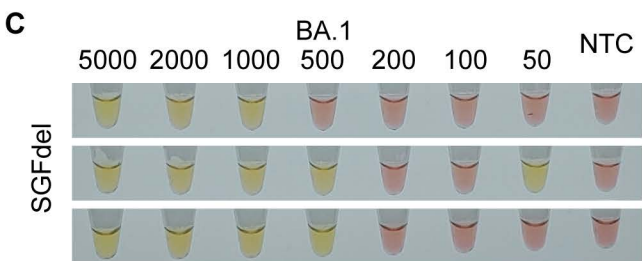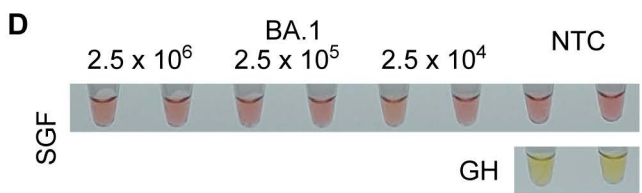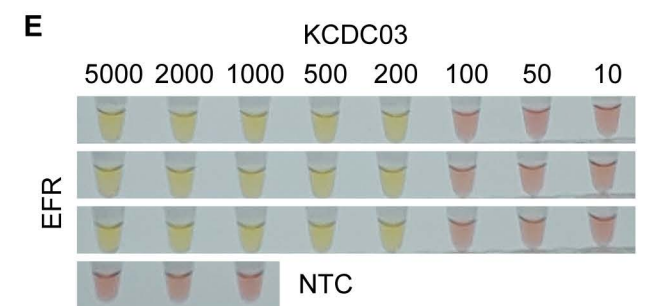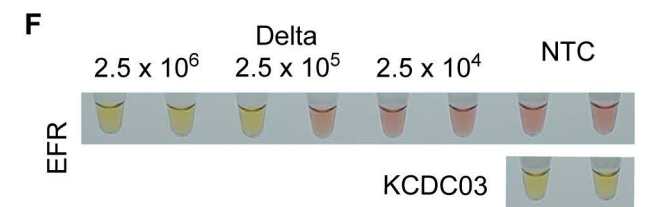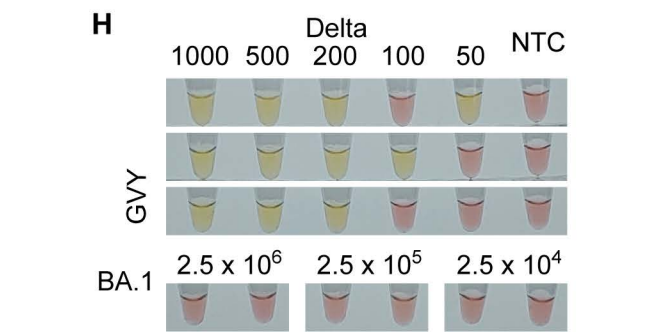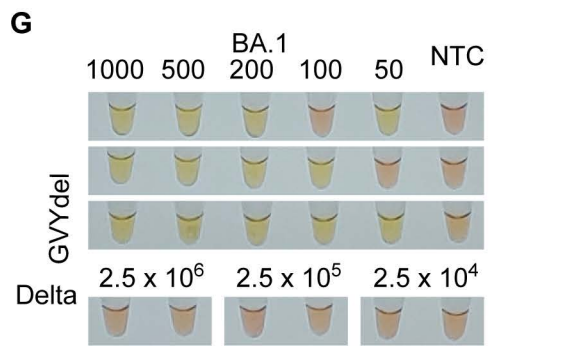



**A**

|      |   | OSD    | GH     |        | Alpha  |       |       | Beta  |       |       |
|------|---|--------|--------|--------|--------|-------|-------|-------|-------|-------|
| 5000 | N | 0.759  | 0.728  | 0.621  | 0.450  | 0.373 | 0.504 | 0.365 | 0.436 | 0.435 |
|      | Y | 0.535  | 0.388  | 0.504  | 0.926  | 0.671 | 0.794 | 0.812 | 1.079 | 0.974 |
| 2000 | N | 0.788  | 0.784  | 0.783  | 0.474  | 0.372 | 0.424 | 0.455 | 0.489 | 0.190 |
|      | Y | 0.490  | 0.453  | 0.616  | 0.462  | 0.790 | 0.859 | 0.787 | 0.753 | 0.825 |
| 1000 | N | 0.877  | 0.382  | 0.792  | 0.356  | 0.439 | 0.418 | 0.463 | 0.303 | 0.465 |
|      | Y | 0.438  | 0.431  | 0.443  | -0.008 | 0.794 | 0.768 | 0.834 | 0.811 | 0.843 |
| 500  | N | 0.720  | 0.694  | 0.760  | 0.157  | 0.335 | 0.438 | 0.256 | 0.438 | 0.048 |
|      | Y | 0.021  | 0.367  | 0.385  | 0.914  | 0.948 | 0.829 | 0.258 | 0.847 | 0.819 |
| NTC  | N | -0.009 | 0.111  | 0.029  |        |       |       |       |       |       |
|      | Y | 0.044  | -0.004 | -0.046 |        |       |       |       |       |       |

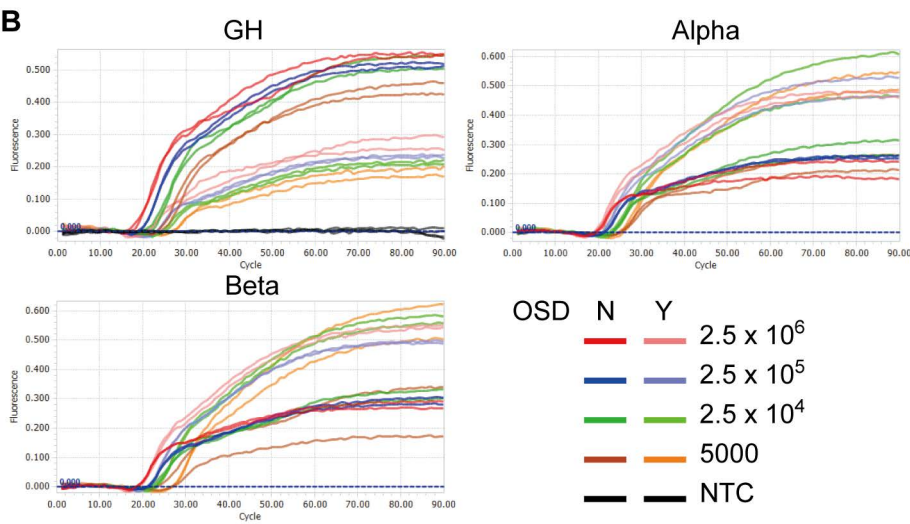

Source: https://www.biorxiv.org/content/10.1101/2022.06.16.496383v1.full.pdf
