# Supplementary material for: Development and Evaluation of RT-LAMP Assays to Identify Variants of SARS-CoV-2
Source: bioRxiv or medRxiv preprint supplement (doi:10.1101/2022.06.16.496383), 2022-06-16
Supplement: Supplementary file [file media-1.pdf]

Supplementary Information for:

## **Development and Evaluation of RT-LAMP Assays to Identify Variants of SARS-CoV-2**

Gun-Soo Park<sup>1,2\*</sup>, Seong-Jun Kim<sup>1</sup>, Jin-Soo Maeng<sup>1,2\*</sup>

<sup>1</sup> *Center for Convergent Research of Emerging Virus Infection, Korea Research Institute of Chemical Technology, Daejeon 34114, Republic of Korea*

<sup>2</sup> *Research Division of Food Convergence, Korea Food Research Institute, Wanju-gun, Jeollabuk-do 55365, Republic of Korea*

\* Corresponding authors

Gun-Soo Park (pcdhmk@kRICT.re.kr), and Jin-Soo Maeng (maengjs@kRICT.re.kr)

**Supplementary Table 1.** Sequences of LAMP primers and OSD probes

| Set Name    | Primer   | Sequence <sup>^</sup>                                                                |
|-------------|----------|--------------------------------------------------------------------------------------|
| <b>SGF</b>  | F3       | 5' – GCGTATTATGACATGGTTGG – 3'                                                       |
|             | B3       | 5' – ACTTTATAAACGAGTGTCAAGAC – 3'                                                    |
|             | FIP      | 5' – ACAGCTGATGCATACATAACACA TATGGTTGATACTAGTTT <u>GTCTGG</u> – 3'                   |
|             | FIPdel*  | 5' – ACAGCTGATGCATACATAACACA TATGGTTGATACTAGTTTGAAGC – 3'                            |
|             | BIP      | 5' – TAATCCTTATGACAGCAAGAACTGT ATTCATAAGTGTCCACACTCTC – 3'                           |
|             | LB       | 5' – GTATGATGATGGTGCTAG – 3'                                                         |
| <b>EFR</b>  | F3       | 5' – GTGAATTTCAATTTTGAATGATCC – 3'                                                   |
|             | B3       | 5' – AAACCCTGAGGGAGATCA – 3'                                                         |
|             | FIP      | 5' – CCATAAGAAAAGGCTGAGAGACATA GTTGGATGGAAAGT <u>GAGTTCA</u> – 3'                    |
|             | BIP      | 5' – ACCTTGAAGGAAAACAGGGTAATT AATTAATAGGCGTGTGCTTAG – 3'                             |
|             | LF       | 5' – CAAAAGTGCAATTATTCGCACTAG – 3'                                                   |
|             | LB       | 5' – TCAAAAATCTTAGGGAATTTGTGTT – 3'                                                  |
| <b>GVY</b>  | F3       | 5' – CTAATGTTGTTATTAAGTCTGTGA – 3'                                                   |
|             | B3       | 5' – ATTCTTAAACACAAATTCCTAAG – 3'                                                    |
|             | FIP      | 5' – CACTTTCCATCCAACCTTTGTTG GTAATGATCCATTTTTGGGT <u>GTI</u> – 3'                    |
|             | FIPdel   | 5' – AACTCTGAACTCACTTTCCATCC GTAATGATCCATTTTTGG <u>ACCA</u> – 3'                     |
|             | BIP      | 5' – TCTAGTGCGAATAATTGCACTTTTG ACCCTGTTTTCTTCAAGGT – 3'                              |
|             | LB       | 5' – ATGTCTCTCAGCCTTTTCTTATGG – 3'                                                   |
| <b>S501</b> | F3       | 5' – CTGTATAGATTGTTTAGGAAGTCT – 3'                                                   |
|             | B3       | 5' – CTTTTTAGGTCCACAAACAGT – 3'                                                      |
|             | FIP      | 5' – TYAACACCATTACAAGGTGTGCT AATCTCAAACCTTTTGAGAGAG – 3'                             |
|             | BIP      | 5' – TACAATCATATGGTTTCCAACC CTGGTGCATGTAGAAGTTCAA – 3'                               |
|             | LF       | 5' – CCGGCCTGATAGATTTCAAGTTG – 3'                                                    |
|             | LB       | 5' – CCAACCATACAGAGTAGTAGTACT – 3'                                                   |
|             | Probe_N  | 5' – /6-FAM/ ACTACTACTCTGTATGGTTGGTAACCAACACCATA <u>A</u> AGTG<br>/Inverted dT/ – 3' |
|             | Probe_Y  | 5' – /6-FAM/ ACTACTACTCTGTATGGTTGGTAACCAACACCATT <u>A</u> AGTG<br>/Inverted dT/ – 3' |
|             | Quencher | 5' – GTTGGTTACCAACCATACAGAGTAGTAGT /BHQ1/ – 3'                                       |

<sup>^</sup> Residues affected by mutations are designated by underline.

\* Mismatching nucleotide residue to Omicron-BA.1 was designated by *italic*.

**Supplementary Table 2.** Sequences of qRT-PCR primers and probes

| <b>Set Name</b>         | <b>Primer</b> | <b>Sequence</b>                                    | <b>Working Concentration (nmol/L)</b> |
|-------------------------|---------------|----------------------------------------------------|---------------------------------------|
| <b>Nsp3<sup>^</sup></b> | F             | 5' – GAAGAGCAAGAAGAAGATTGGT – 3'                   | 400                                   |
|                         | R             | 5' – TGGTGTAAGTTCCATCTCTAATTG – 3'                 | 400                                   |
|                         | P             | 5' – /6-FAM/ ACGGCAGTGAGGACAATCAGACA /BHQ1/ – 3'   | 200                                   |
| <b>S3<sup>*</sup></b>   | F             | 5' – GGTGATTCTTCTTCAGGTTGGA – 3'                   | 400                                   |
|                         | R             | 5' – GTACACTTTGTTTCTGAGAGAGG – 3'                  | 400                                   |
|                         | P             | 5' – /6-FAM/ CTGGTGCTGCAGCTTATTATGTGGG /BHQ1/ – 3' | 200                                   |

<sup>^</sup> Nsp3 set was used to titrate Orf1 copy number of viral RNAs corresponding to SGF/SGFdel LAMP.

<sup>\*</sup> S3 set was used to titrate Spike copy number of viral RNAs corresponding to EGR/GVY/GVYdel/S501 LAMP.

## Supplementary Figure 1

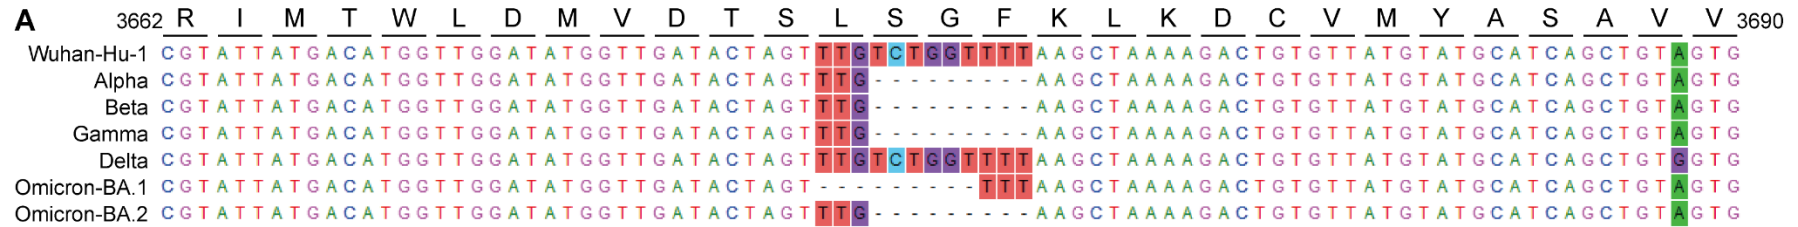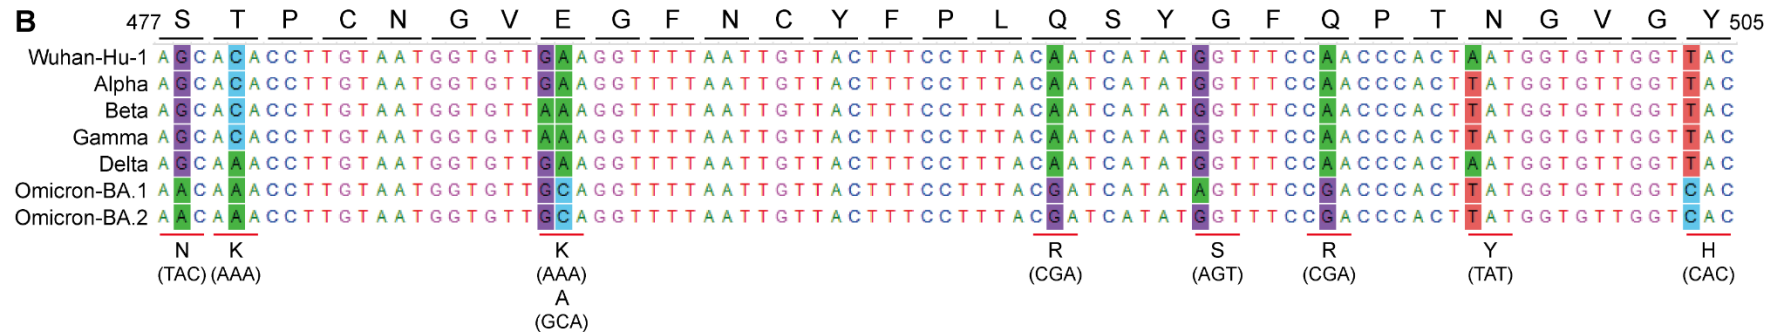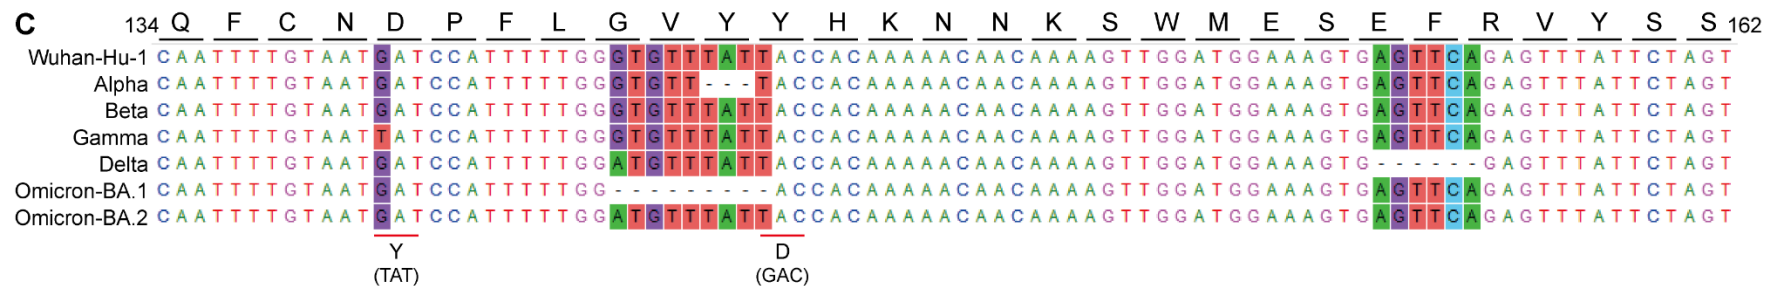

**Supplementary Figure 1.** Aligned sequences (A) around Orf1a SGF3675-3677del mutation, (B) of Spike S477 to Y505 related to N501Y targeting OSD-probe RT-LAMP, and (C) around Spike EF156-157del+R158G and GVV142-144del+Y145D mutations. Corresponding amino acids are designated above of each panel. Changed amino acids by mutations are designated by red lines with corresponding codons. Wuhan-Hu-1 sequence is the NCBI reference sequence (NC\_045512.2). Sequences of variants are obtained from GISAID (<https://www.gisaid.org/>) and accession ID are as follow: Alpha – EPI\_ISL\_601443, Beta – EPI\_ISL\_660190, Gamma – EPI\_ISL\_833137, Delta – EPI\_ISL\_1409773, Omicron-BA.1 – EPI\_ISL\_7545782, and Omicron-BA.2 – EPI\_ISL\_7190366.

## Supplementary Figure 2

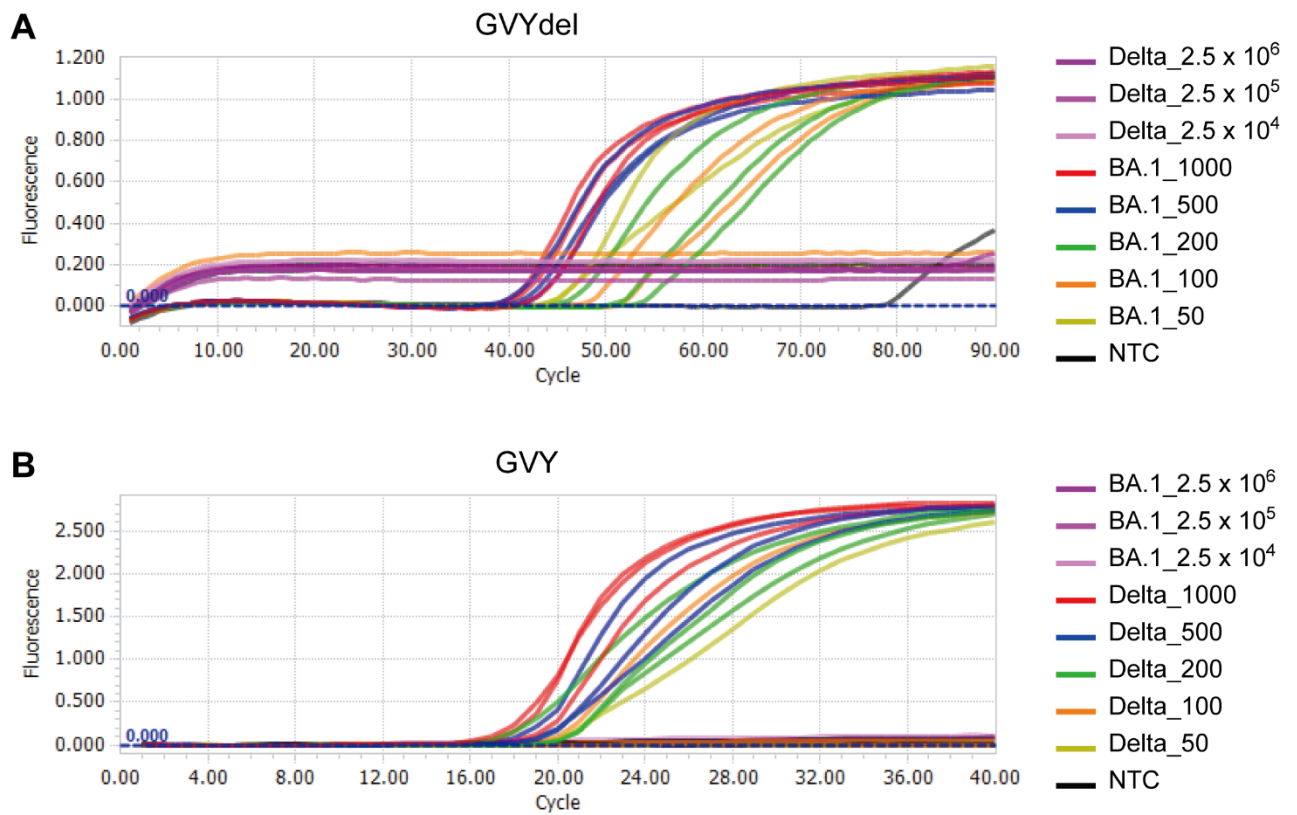

**Supplementary Figure 2.** Real-time SYTO-9 fluorescence signal of GYdel (A) and GY (B) primer sets corresponding to panel (G) and (H) of main Figure 1, respectively.

## Supplementary Figure 3

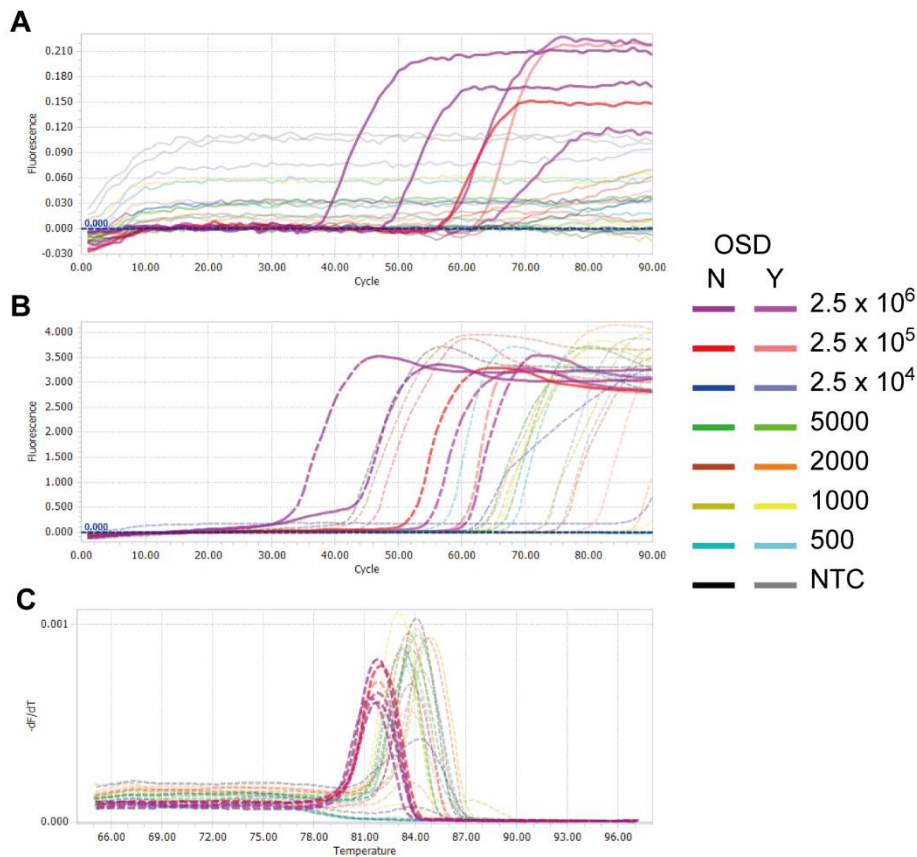

**Supplementary Figure 3.** Real-time fluorescence signal of (A) FAM from OSD-probes, (B) SYTO-82, and (C) melting curve of SYTO-82 from OSD-probe RT-LAMP test with Omicron-BA.1 viral RNA. Copy number per reaction and OSD-probe targets are indicated for each color of lines. Template-derived proper amplifications are indicated by bolded lines.
